# Supplementary material for: Effects of Sec-Octanol and Terpineol on Froth Properties and Flotation Selectivity Index for Microcrystalline Graphite
Source: MDPI journal article supplement (doi:10.3390/min13091231), 2023-09-20
Supplement: s1 [file s1]

# Effects of Sec-octanol and Terpeneol on Froth Properties and Flotation Selectivity Index for Microcrystalline Graphite

Xuexia Wang <sup>1,\*</sup>, Juan Zhang <sup>2</sup>, Muhammad Bilal <sup>3</sup>, Xiangning Bu <sup>4,\*</sup>, Yemin Wang <sup>1</sup>

<sup>1</sup> Department of Mining Engineering, Shanxi Institute of Technology, Yangquan 045000, China

<sup>2</sup> Shandong Polytechnic College, Jining 272067, China

<sup>3</sup> Department of Mining Engineering, Balochistan University of Information Technology, Engineering and Management Sciences (BUIITEMS), Quetta 87300, Pakistan

<sup>4</sup> Key Laboratory of Coal Processing and Efficient Utilization (Ministry of Education), School of Chemical Engineering and Technology, China University of Mining and Technology, Xuzhou 221116, China

\* Correspondence: wangxuexia@sxit.edu.cn, wxuexia1989@163.com (X. W.); xiangning.bu@cumt.edu.cn, xiangning.bu@foxmail.com (X. B.).

Results of recoveries of combustible materials and ash materials for flotation concentrate as well as the first-order rate constants and  $R_{\infty}$

## 1. Sec-octanol

Table S1 The results of  $R_c$ ,  $R_a$ ,  $K$ , and  $R_{\infty}$  for sec-octanol

| Dosage of sec-octanol / (g/t) | Time / (min) | $R_{c1}$ / (%) | $R_{a1}$ / (%) | $K_{I1}$ / ( $\text{min}^{-1}$ ) | $R_{c\infty 1}$ / (%) | $K_{II1}$ / ( $\text{min}^{-1}$ ) | $R_{a\infty 1}$ / (%) |
|-------------------------------|--------------|----------------|----------------|----------------------------------|-----------------------|-----------------------------------|-----------------------|
| 2000                          | 1            | 24.67          | 23.53          | 0.37                             | 73.49                 | 0.37                              | 70.39                 |
|                               | 3            | 47.18          | 45.05          |                                  |                       |                                   |                       |
|                               | 6            | 66.12          | 63.23          |                                  |                       |                                   |                       |
| 3000                          | 1            | 61.49          | 57.66          | 1.04                             | 93.88                 | 1.00                              | 89.82                 |
|                               | 3            | 87.00          | 82.64          |                                  |                       |                                   |                       |
|                               | 6            | 95.64          | 91.49          |                                  |                       |                                   |                       |
| 4000                          | 1            | 50.21          | 47.02          | 0.80                             | 89.28                 | 0.77                              | 85.17                 |
|                               | 3            | 78.94          | 74.78          |                                  |                       |                                   |                       |
|                               | 6            | 89.87          | 85.57          |                                  |                       |                                   |                       |
| 5000                          | 1            | 59.45          | 53.75          | 0.96                             | 96.15                 | 0.88                              | 91.27                 |
|                               | 3            | 90.01          | 84.22          |                                  |                       |                                   |                       |
|                               | 6            | 96.31          | 91.19          |                                  |                       |                                   |                       |

**Notes:**  $R_c$  and  $R_a$  are the recovery of combustible materials and ash materials for flotation concentrate, respectively;

$K_I$  and  $K_{II}$  refer to the first-order rate constant for the combustible materials and the ash materials in the flotation concentrate, respectively;

$R_{c\infty}$  and  $R_{a\infty}$  denote the ultimate recovery of combustible materials and ash materials for flotation concentrate, respectively.

Table S2 The results of repeated tests of  $R_c$ ,  $R_a$ ,  $K$ , and  $R_\infty$  for sec-octanol

| Dosage of sec-octanol / (g/t) | Time / (min) | $R_{c2}$ / (%) | $R_{a2}$ / (%) | $K_{I2}$ / ( $\text{min}^{-1}$ ) | $R_{c\infty 2}$ / (%) | $K_{II2}$ / ( $\text{min}^{-1}$ ) | $R_{a\infty 2}$ / (%) |
|-------------------------------|--------------|----------------|----------------|----------------------------------|-----------------------|-----------------------------------|-----------------------|
| 2000                          | 1            | 27.55          | 26.26          | 0.43                             | 69.22                 | 0.42                              | 65.33                 |
|                               | 3            | 46.28          | 42.82          |                                  |                       |                                   |                       |
|                               | 6            | 65.31          | 61.63          |                                  |                       |                                   |                       |
| 3000                          | 1            | 59.77          | 55.84          | 1.01                             | 92.73                 | 1.00                              | 87.05                 |
|                               | 3            | 86.31          | 80.80          |                                  |                       |                                   |                       |
|                               | 6            | 93.93          | 88.23          |                                  |                       |                                   |                       |
| 4000                          | 1            | 46.10          | 42.44          | 0.66                             | 93.63                 | 0.64                              | 87.62                 |
|                               | 3            | 79.59          | 73.33          |                                  |                       |                                   |                       |
|                               | 6            | 92.50          | 86.51          |                                  |                       |                                   |                       |
| 5000                          | 1            | 63.21          | 58.95          | 1.07                             | 95.48                 | 1.03                              | 90.60                 |
|                               | 3            | 90.46          | 84.94          |                                  |                       |                                   |                       |
|                               | 6            | 96.22          | 91.58          |                                  |                       |                                   |                       |

## 2. Terpineol

Table S3 The results of  $R_c$ ,  $R_a$ ,  $K$ , and  $R_\infty$  for terpineol

| Dosage of terpineol / (g/t) | Time / (min) | $R_{c1}$ / (%) | $R_{a1}$ / (%) | $K_{I1}$ / ( $\text{min}^{-1}$ ) | $R_{c\infty 1}$ / (%) | $K_{II1}$ / ( $\text{min}^{-1}$ ) | $R_{a\infty 1}$ / (%) |
|-----------------------------|--------------|----------------|----------------|----------------------------------|-----------------------|-----------------------------------|-----------------------|
| 2000                        | 1            | 25.23          | 23.47          | 0.36                             | 78.03                 | 0.37                              | 70.14                 |
|                             | 3            | 49.40          | 44.93          |                                  |                       |                                   |                       |
|                             | 6            | 69.41          | 63.03          |                                  |                       |                                   |                       |
| 3000                        | 1            | 52.15          | 48.55          | 0.80                             | 92.37                 | 0.78                              | 87.16                 |
|                             | 3            | 81.96          | 76.79          |                                  |                       |                                   |                       |
|                             | 6            | 92.94          | 87.65          |                                  |                       |                                   |                       |
| 4000                        | 1            | 50.61          | 46.93          | 0.78                             | 91.34                 | 0.76                              | 86.09                 |
|                             | 3            | 80.02          | 74.99          |                                  |                       |                                   |                       |
|                             | 6            | 91.92          | 86.47          |                                  |                       |                                   |                       |
| 5000                        | 1            | 62.28          | 57.06          | 1.11                             | 91.54                 | 1.05                              | 86.36                 |
|                             | 3            | 85.58          | 79.94          |                                  |                       |                                   |                       |
|                             | 6            | 93.48          | 88.20          |                                  |                       |                                   |                       |

Table S4 The results of repeated tests of  $R_c$ ,  $R_a$ ,  $K$ , and  $R_\infty$  for terpineol

| Dosage of terpineol / (g/t) | Time / (min) | $R_{c2}$ / (%) | $R_{a2}$ / (%) | $K_{l2}$ / (min <sup>-1</sup> ) | $R_{c\infty 2}$ / (%) | $K_{ll2}$ / (min <sup>-1</sup> ) | $R_{a\infty 2}$ / (%) |
|-----------------------------|--------------|----------------|----------------|---------------------------------|-----------------------|----------------------------------|-----------------------|
| 2000                        | 1            | 25.55          | 23.92          | 0.37                            | 77.00                 | 0.37                             | 70.38                 |
|                             | 3            | 49.60          | 45.58          |                                 |                       |                                  |                       |
|                             | 6            | 69.14          | 63.61          |                                 |                       |                                  |                       |
| 3000                        | 1            | 49.84          | 46.50          | 0.80                            | 88.39                 | 0.79                             | 82.85                 |
|                             | 3            | 78.04          | 72.54          |                                 |                       |                                  |                       |
|                             | 6            | 89.07          | 83.64          |                                 |                       |                                  |                       |
| 4000                        | 1            | 52.25          | 49.01          | 0.81                            | 92.90                 | 0.79                             | 88.41                 |
|                             | 3            | 83.01          | 78.39          |                                 |                       |                                  |                       |
|                             | 6            | 93.16          | 88.62          |                                 |                       |                                  |                       |
| 5000                        | 1            | 62.83          | 58.62          | 1.09                            | 93.83                 | 1.06                             | 88.40                 |
|                             | 3            | 88.01          | 82.31          |                                 |                       |                                  |                       |
|                             | 6            | 95.34          | 90.04          |                                 |                       |                                  |                       |
